# Supplementary material for: Beneficial effects of exercise on gut microbiota functionality and barrier integrity, and gut-liver crosstalk in an in vivo model of early obesity and non-alcoholic fatty liver disease
Source: PubMed Central journal article supplement (PMC6550047; doi:10.1242/dmm.039206), 2019-04-30
Supplement: dmm-12-039206-s1.pdf [file dmm-12-039206-s1.pdf]

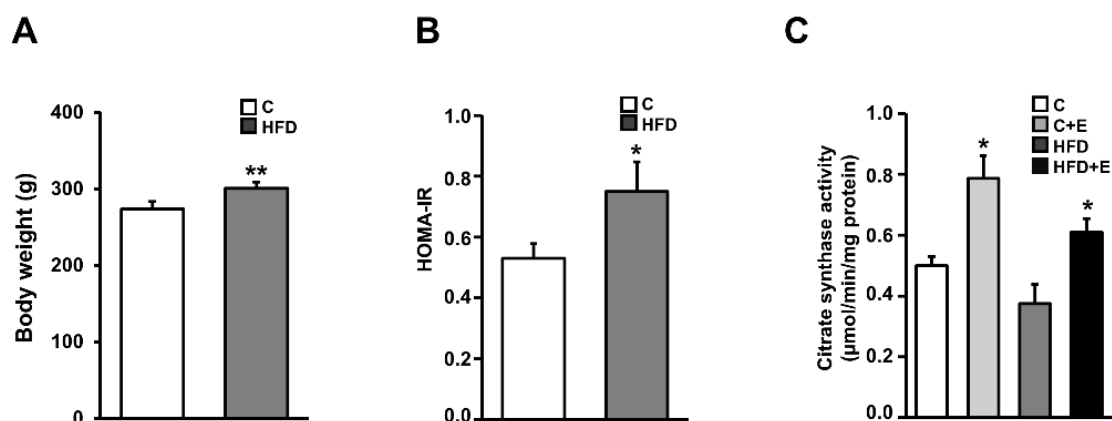

**Figure S1.** HFD-induced obesity and metabolic syndrome onset and exercise

effectiveness in our *in vivo* model. (A) Body weight and (B) Insulin resistance (HOMA-IR) of pubertal male Wistar rats fed either with control or high-fat diet (HFD) during 6 weeks prior exercise training. (C) Citrate synthase activity measured in vastus lateralis muscle from trained and sedentary rats in the 11<sup>th</sup> week, after 5 weeks of exercise performance. Data are presented as mean  $\pm$  SEM of 12 rats per group. \* $p$  < 0.05, \*\* $p$  < 0.01 vs Control; # $p$  < 0.05 vs HFD.

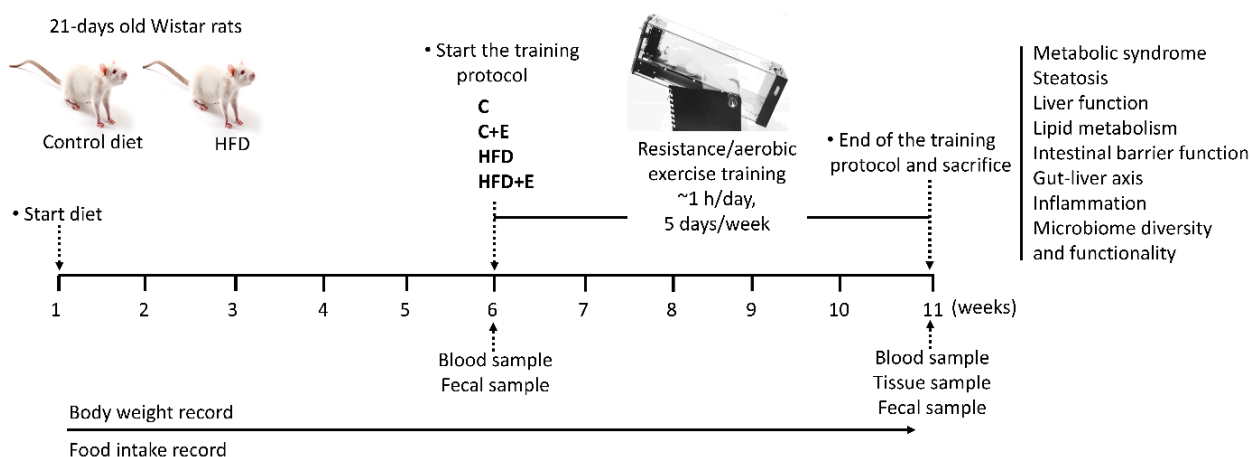

**Figure S2.** Experimental design of the *in vivo* model of early obesity and NAFLD. 21-days old male Wistar rats were fed with control or high fat diet (HFD) for 6 weeks followed by 5 weeks of an exercise training protocol. Body weight gain and food intake were weekly monitored. Blood and fecal samples were taken before and after the training protocol. At the end of the study rats were sacrificed to evaluate the effect of exercise in obesity/NAFLD related parameters.

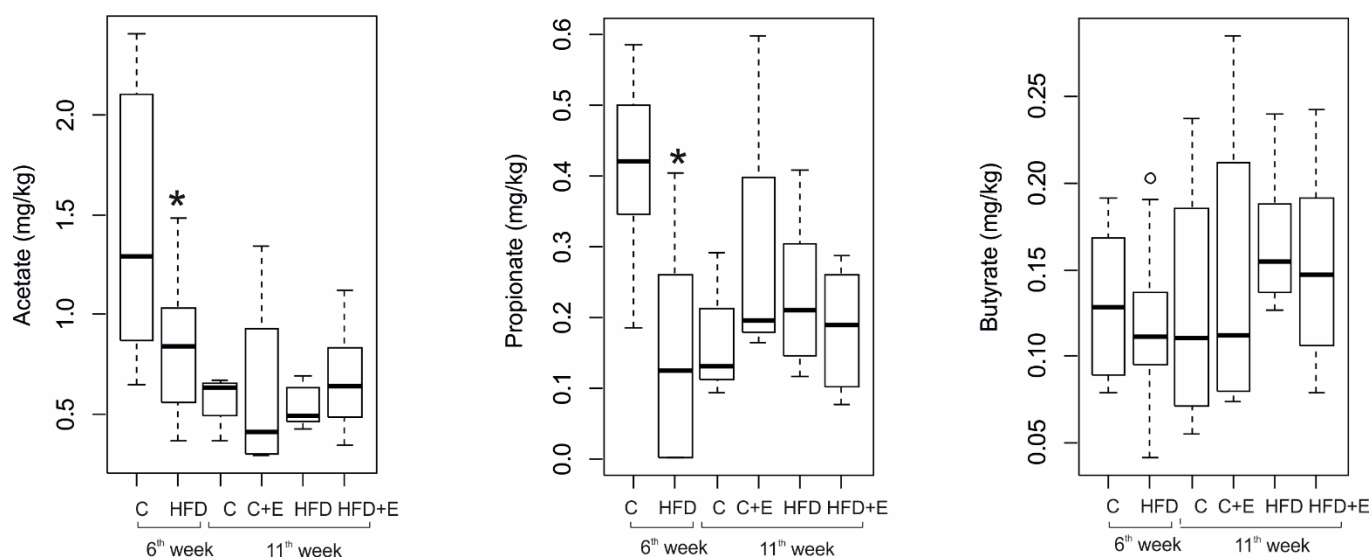

**Figure S3.** Fecal concentration of short chain fatty acids in rats. Box plots

represent the differences related to acetate, propionate and butyrate concentrations (mg/kg) between control and HFD-fed rats with and without exercise training. Statistical analysis was performed using Kruskal-Wallis followed by Mann-Whitney U test ( $p < 0.05$ ). <sup>a</sup> $p < 0.05$  vs Control (6<sup>th</sup> week),  $*p < 0.05$  vs Control.

**Table S1.** Animal diet composition

|                                       | <b>D12450J</b> |                | <b>D12492</b> |                |
|---------------------------------------|----------------|----------------|---------------|----------------|
|                                       | <b>g (%)</b>   | <b>kcal(%)</b> | <b>g(%)</b>   | <b>kcal(%)</b> |
| Protein                               | 19             | 20             | 26            | 20             |
| Carbohydrate                          | 67             | 70             | 26            | 20             |
| Fat                                   | 4              | <b>10</b>      | 35            | <b>60</b>      |
| Total                                 |                | 100            |               | 100            |
| kcal/g                                | 3.8            |                | 5.2           |                |
|                                       |                |                |               |                |
| <b>Ingredient</b>                     | <b>g</b>       | <b>kcal</b>    | <b>g</b>      | <b>kcal</b>    |
| Casein                                | 200            | 800            | 200           | 800            |
| L-Cystine                             | 3              | 12             | 3             | 12             |
|                                       |                |                |               |                |
| Corn Starch                           | 506.2          | 2025           | 0             | 0              |
| Maltodextrin 10                       | 125            | 500            | 125           | 500            |
| Sucrose                               | 68.8           | 275            | 68.8          | 275            |
|                                       |                |                |               |                |
| Cellulose, BW200                      | 50             | 0              | 50            | 0              |
|                                       |                |                |               |                |
| Soybean Oil                           | 25             | 225            | 25            | 225            |
| Lard                                  | 20             | 180            | 245           | 2205           |
|                                       |                |                |               |                |
| Mineral Mix S10026                    | 10             | 0              | 10            | 0              |
| DiCalcium Phosphate                   | 13             | 0              | 13            | 0              |
| Calcium Carbonate                     | 5.5            | 0              | 5.5           | 0              |
| Potassium Citrate, 1 H <sub>2</sub> O | 16.5           | 0              | 16.5          | 0              |
|                                       |                |                |               |                |
| Vitamin Mix V10001                    | 10             | 40             | 10            | 40             |
| Choline Bitartrate                    | 2              | 0              | 2             | 0              |
|                                       |                |                |               |                |
| Yellow Dye                            | 0.04           | 0              | 0             | 0              |
| Blue Dye                              | 0.01           | 0              | 0.05          | 0              |
|                                       |                |                |               |                |
| <b>Total</b>                          | <b>1055.05</b> | <b>4057</b>    | <b>773.85</b> | <b>4057</b>    |

**Table S2.** Details of the combined aerobic and resistance exercise training protocol performed by the training groups.

|                                                                                     |             | Week 1  | Week 2  | Week 3  | Week 4  | Week 5  |
|-------------------------------------------------------------------------------------|-------------|---------|---------|---------|---------|---------|
| <b>Warm-up</b><br>10 min run                                                        | Inclination | 0%      | 0%      | 0%      | 0%      | 0%      |
|                                                                                     | Speed       | 15 cm/s | 15 cm/s | 15 cm/s | 15 cm/s | 15 cm/s |
| <b>Resistance training</b><br>Eight repeats (2-min bouts) +1-min rest<br>Rest 5 min | Inclination | 10%     | 10%     | 15%     | 15%     | 20%     |
|                                                                                     | Speed       | 20 cm/s | 25 cm/s | 20 cm/s | 25 cm/s | 20 cm/s |
| <b>Aerobic training</b><br>30 min continuous running                                | Inclination | 10%     | 10%     | 15%     | 15%     | 20%     |
|                                                                                     | Speed       | 20 cm/s | 25 cm/s | 20 cm/s | 25 cm/s | 20 cm/s |

**Table S3.** Primers used for RT-qPCR analysis.

|                                             | Sense primer sequence (5'-3')                           | Antisense primer sequence (5'-3')                               |
|---------------------------------------------|---------------------------------------------------------|-----------------------------------------------------------------|
| <b>Rat primers</b>                          |                                                         |                                                                 |
| <b>CYP2E1</b>                               | ACCTTCAGTCACTGGACATCAA                                  | AGGATCAGGAGCCCATATCTC                                           |
| <b>LXR<math>\alpha</math></b>               | GCACGCTACATTTGCCATAG                                    | GAGCCTGCTCCTCTTCTTGA                                            |
| <b>SREBP-1c</b>                             | CAGAGGGACTACAGGCTGAGAAAG                                | CACGTAGATCTCTGCCAGTGTTG                                         |
| <b>FAS</b>                                  | TCGGCGAGTCTATGCCACTATT                                  | CCGAGTAATGCCGTTCAAGTTC                                          |
| <b>FAT/CD36</b>                             | GATGTGGAACCCATAACTGGA                                   | CTTTCTCATCGCCAATGGTC                                            |
| <b>C/EBP<math>\alpha</math></b>             | GCCAAGAAGTCGGTGGACAAGAAC                                | CGGTCATTGTCACTGGTCAACTCC                                        |
| <b>TLR-4</b>                                | TTCCTTTCTGCCTGAGACC                                     | CATGCCATGCCTTGTCTTCA                                            |
| <b>TNF-<math>\alpha</math></b>              | AAATGGGCTCCCTCTCATCAGTTC                                | TCTGCTTGGTGGTTTGCTACGAC                                         |
| <b>IL-6</b>                                 | TCTCTCCGCAAGAGACTTCCA                                   | ATACTGGTCTGTTGTGGGTGG                                           |
| <b>CLDN-1</b>                               | AGGCAACCAGACCTTGAT                                      | CATGCACTTCATGCCAATGGTGA                                         |
| <b>OCLN</b>                                 | TTACGGCTATGGAGGGTAC                                     | TGACGCTGGTAACAAAGAT                                             |
| <b>SHP</b>                                  | GGCACTATCCTCTTCAACCCA                                   | TCCAGGACTTCACACAATGCC                                           |
| <b>FXR</b>                                  | CCACGACCAAGCTATGCAG                                     | TCTCTGTTTGCTGTATGAGTCCA                                         |
| <b>NTCP</b>                                 | AAAATCAAGCCTCCAAAGGAC                                   | TTGTGGGTACCTTTTTCCAGA                                           |
| <b>BSEP</b>                                 | CGGTGGCTGAGAGATCAAAT                                    | TGCGATAGTGGTGGAGAACA                                            |
| <b>GAPDH</b>                                | GGCACAGTCAAGGCTGAGAATG                                  | ATGGTGGTGAAGACGCCAGTA                                           |
| <b>Bacterial primers</b>                    |                                                         |                                                                 |
| <b>16S rRNA 926F-1062R (total bacteria)</b> | AAACTCAAAGKAATTGACGG                                    | CTCACRRCACGAGCTGAC                                              |
| <b>16S rRNA V3-V4</b>                       | TCGTCCGCGAGCGTCAGATGTGTATAA<br>GAGACAGCCTACGGGNGGCWGCAG | GTCTCGTGGGCTCGGAGATGTGTA<br>TAAGAGACAGGACTACHVGGGTA<br>TCTAATCC |

Abbreviations: CYP2E1, Cytochrome P450 2E1; LXR $\alpha$ , Liver X receptor alpha; SREBP-1c, Sterol regulatory element-binding protein 1c; FAS, Fatty acid synthase; FAT/CD36, Fatty acid translocase CD36; C/EBP $\alpha$ , CCAAT/enhancer-binding protein alpha; TLR-4, Toll-like receptor 4; TNF- $\alpha$ , Tumor necrosis factor alpha; IL-6, interleukin 6; CLDN-1, Claudin 1; OCLN, Occludin; SHP, Small heterodimer partner; FXR, Farnesoid X receptor; NTCP, Na<sup>+</sup>/taurocholate cotransporting polypeptide; BSEP, Bile salt export pump; GAPDH, Glyceraldehyde-3-phosphate dehydrogenase.
